# Supplementary material for: An in situ, reversible fluorescent paper sensor for selective detection of ambient CO2
Source: Royal Society of Chemistry journal article supplement (doi:10.1039/d2tc05116h), 2022-12-08
Supplement: d2tc05116h1.pdf [file d2tc05116h1.pdf]

**Electronic Supplementary Information (ESI) for**  
**An in-situ, reversible fluorescent paper sensor for**  
**selective detection of ambient CO<sub>2</sub>**

Chu Zhang, Yiwen Ding, Min Zhou, Yu Xiang, and Aijun Tong\*

Department of Chemistry, Beijing Key Laboratory for Microanalytical Methods and Instrumentation, Key Laboratory of Bioorganic Phosphorus Chemistry and Chemical Biology (Ministry of Education), Tsinghua University, Beijing 100084, China

## Contents

|                                            |    |
|--------------------------------------------|----|
| Experimental Section .....                 | 3  |
| <i>Materials and instrumentation</i> ..... | 3  |
| Additional figures and tables .....        | 4  |
| References.....                            | 16 |

## Experimental Section

### Materials and instrumentation

1,8-Diazabicyclo[5.4.0]undec-7-ene (DBU, #6674-22-2, purity 98%) was purchased from Meryer (Shanghai, China). Imidazole (#288-32-4, purity 98%) was purchased from Zancheng sales (Tianjin, China). Hydrobromic acid (#957452, 48.0% wt in H<sub>2</sub>O) was purchased from J&K Scientific Co. Ltd. (Beijing, China). Anthracene (#A800676-25g, purity 98%), 1,3,5-trioxane (#T819525-100g, purity 99.5%), triphenylphosphine (#T818895-100g, purity 99%) were purchased from Macklin Inc. (Shanghai, China). High-purity carbon dioxide (#6039543, purity 99.999%) was purchased from AP Baif Gases Industry Co. Ltd. (Beijing, China). High-purity argon (#QT17, purity 99.999%) was purchased from Huanyu Jinghui Jingcheng Gas Technology Co., Ltd. (Beijing, China). Ethyl cellulose ether (#ISO9001, purity 98%) was purchased from Xlya Chemical Technology Co. Ltd. (Shandong, China). Concentrated ammonia solution (NH<sub>3</sub> solution, 25.0-28.0% wt in H<sub>2</sub>O) and organic solvents of analytical purity were all purchased from Sinopharm Chemical Reagent Beijing Co. (Beijing, China). All chemicals were used as received without further purification.

All UV-Vis absorption spectra were measured on a JASCO V-550 UV-visible spectrometer (Tokyo, Japan). All IR spectra were measured on a PerkinElmer Spectrum 100 spectrometer (Waltham, United States). All fluorescence spectra were recorded using a JASCO FP-8600 fluorescence spectrometer (Tokyo, Japan). If not stated, the bandwidth of excitation and emission were set as 1 nm and 2 nm, respectively. All NMR spectra were recorded using a JOEL JNM-ECZ400S spectrometer (Tokyo, Japan) operated at 400 MHz. All mass spectra were recorded using an LCMS-IT/TOF mass spectrometer (Shimadzu, Japan). All the fluorescent photographs were taken by a Canon EOS 600D camera under a hand-held 254 UV lamp. The determination of fluorescence lifetime was carried out on an FLS 920 combined steady state and fluorescence lifetime spectrometer (Edinburgh, United Kingdom). The determination of fluorescence quantum yield was carried out on a Hamamatsu Photonics C9920-02 absolute PL quantum yield measurement system (Hamamatsu, Japan) under ambient conditions. The determination of CO<sub>2</sub> concentrations in the simulation experiments was carried out on a commercial C7E Airhug CO<sub>2</sub> detector purchased from YEETC (Beijing, China).

## Additional figures and tables

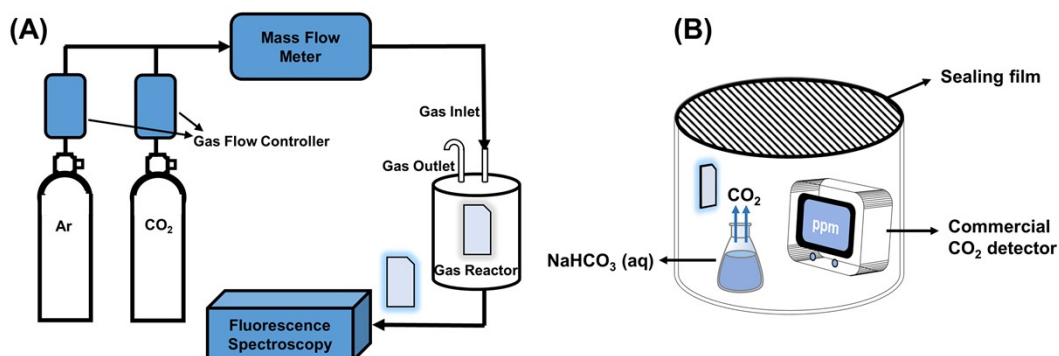

**Scheme S1 (A)** Schematic experimental setup of gaseous CO<sub>2</sub> detection. CO<sub>2</sub> mixed with carrier gas argon (Ar) passes through the mass flow meter and then flows into the gas reactor. **(B)** Schematic experimental setup of the simulation of high concentrations of indoor CO<sub>2</sub>.

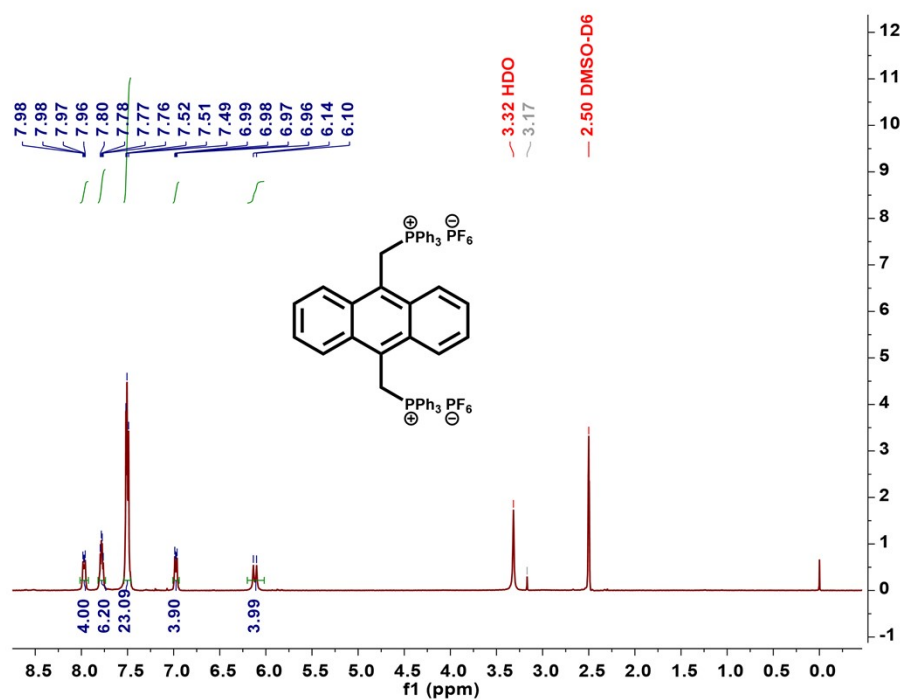

**Figure S1** <sup>1</sup>H-NMR spectrum of ANT-PPh<sub>3</sub>. (Solvent: DMSO-*d*<sub>6</sub>)

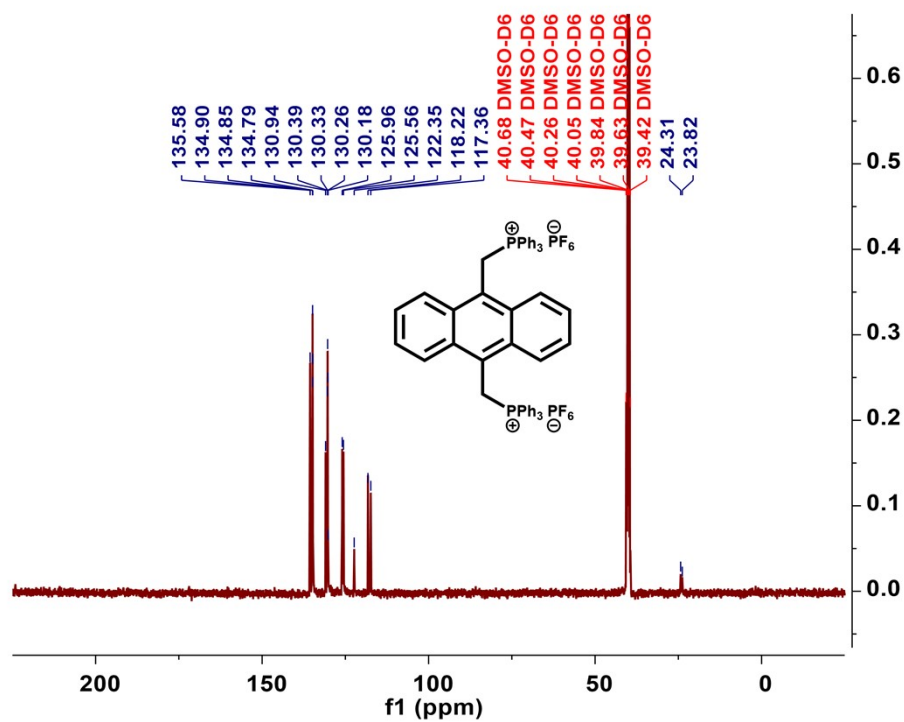

Figure S2 <sup>13</sup>C-NMR spectrum of ANT-PPh<sub>3</sub>. (Solvent: DMSO-*d*<sub>6</sub>)

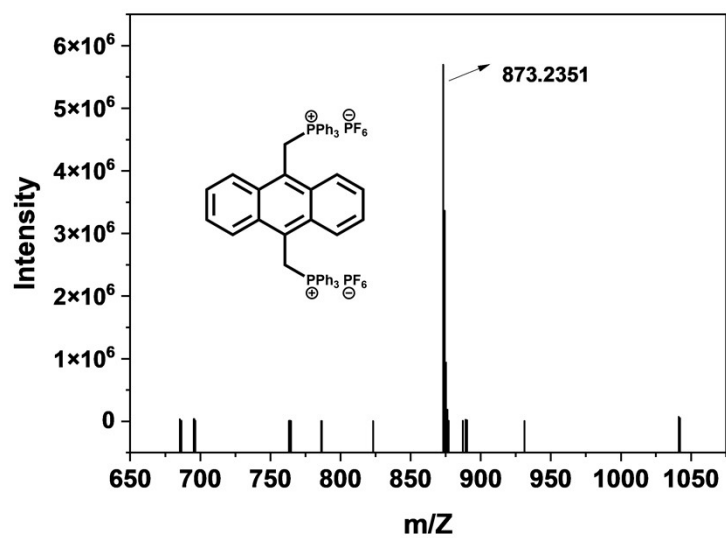

Figure S3 ESI-MS spectrum of ANT-PPh<sub>3</sub>. (Positive mode)

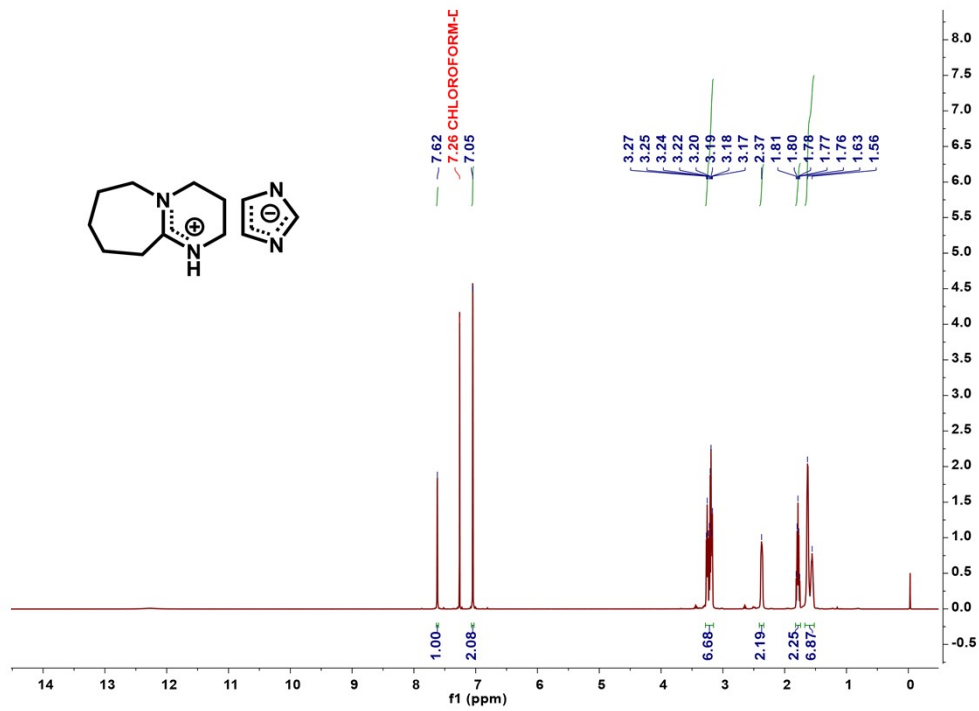

Figure S4 <sup>1</sup>H-NMR spectrum of [DBUH]<sup>+</sup>[Im]<sup>-</sup>. (Solvent: Chloroform-d)

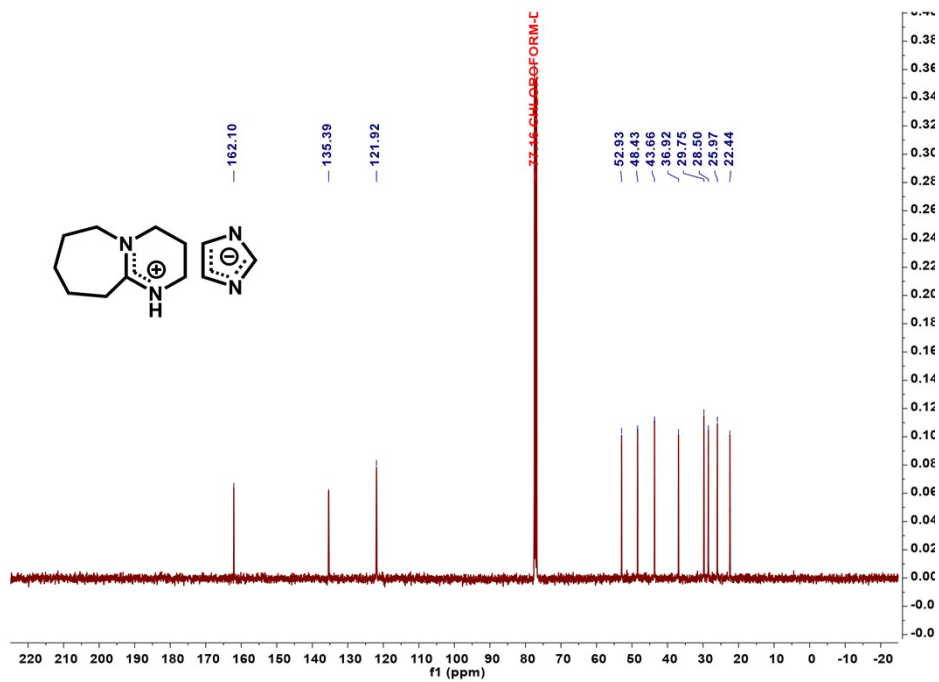

Figure S5 <sup>13</sup>C-NMR spectrum of [DBUH]<sup>+</sup>[Im]<sup>-</sup>. (Solvent: Chloroform-d)

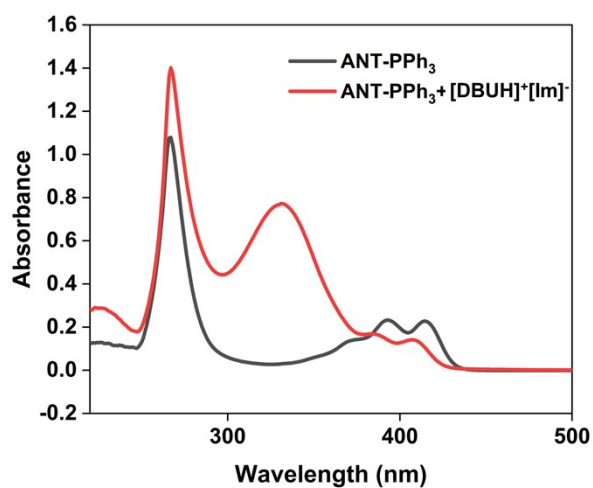

**Figure S6** Absorption spectra of ANT-PPh<sub>3</sub> in DMSO with or without [DBUH]<sup>+</sup>[Im]<sup>-</sup>. [ANT-PPh<sub>3</sub>]= 20 μM, V<sub>[DBUH]<sup>+</sup>[Im]<sup>-</sup></sub> = 10 μL.

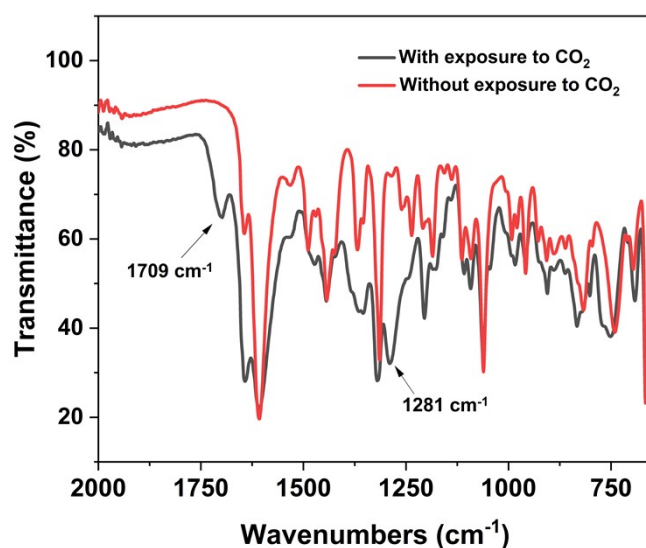

**Figure S7** IR spectra of [DBUH]<sup>+</sup>[Im]<sup>-</sup> before and after reaction of gaseous CO<sub>2</sub>.

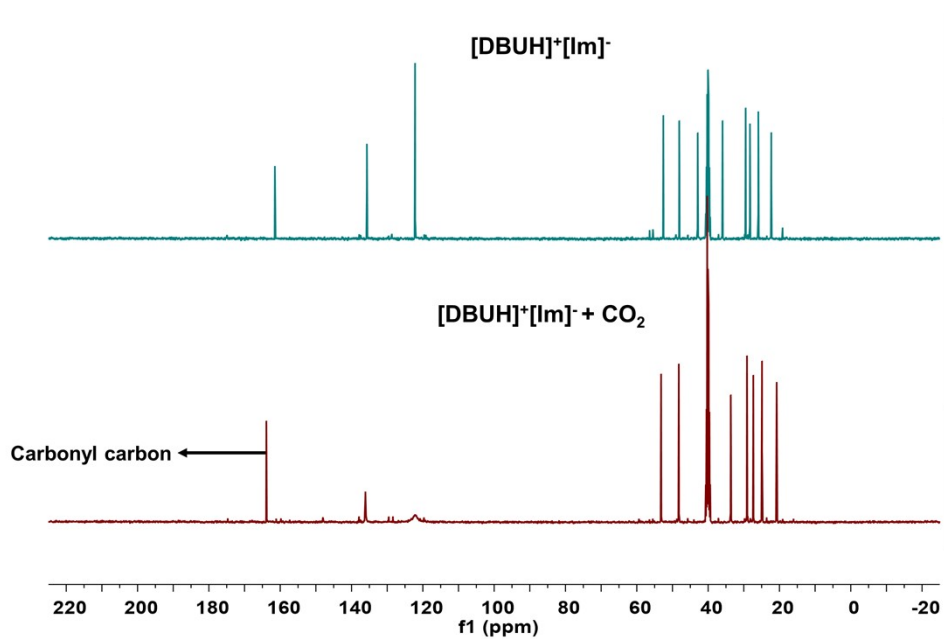

**Figure S8**  $^{13}\text{C}$ -NMR spectra of  $[\text{DBUH}]^+[\text{Im}]^-$  before and after exposure to gaseous  $\text{CO}_2$ . (Solvent:  $\text{DMSO}-d_6$ )

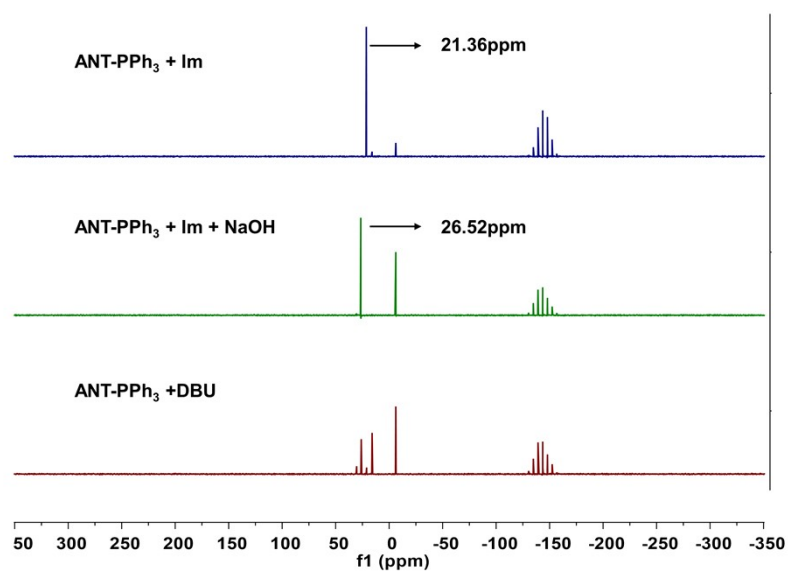

**Figure S9**  $^{31}\text{P}$ -NMR spectra of  $\text{ANT-PPh}_3$  in the presence of excess imidazole, imidazole +  $\text{NaOH}$ , and  $\text{DBU}$ .



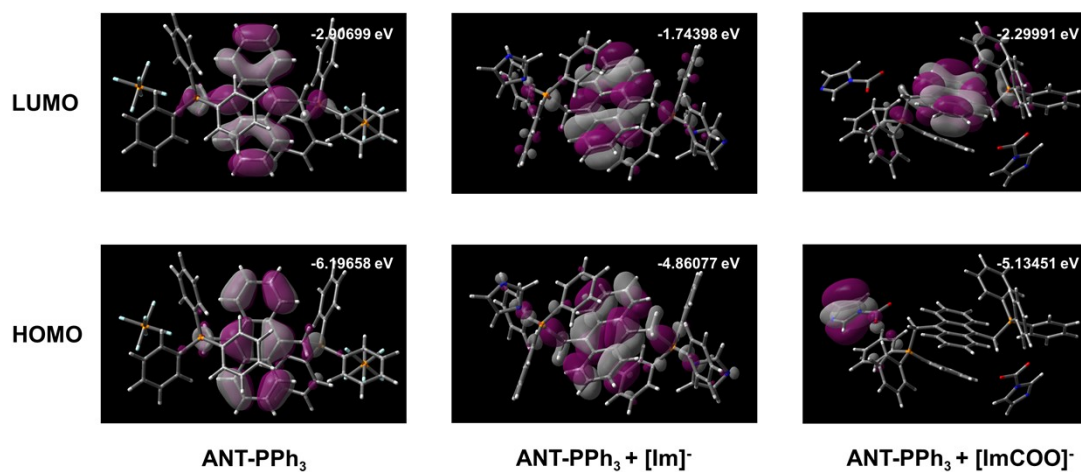

**Figure S10** FMOs (Frontier Molecular Orbital) of ANT-PPh<sub>3</sub>, ANT-PPh<sub>3</sub> + [Im]<sup>-</sup> adduct and ANT-PPh<sub>3</sub> + [ImCOO]<sup>-</sup> adduct using the DFT/B3LYP-d3 method.

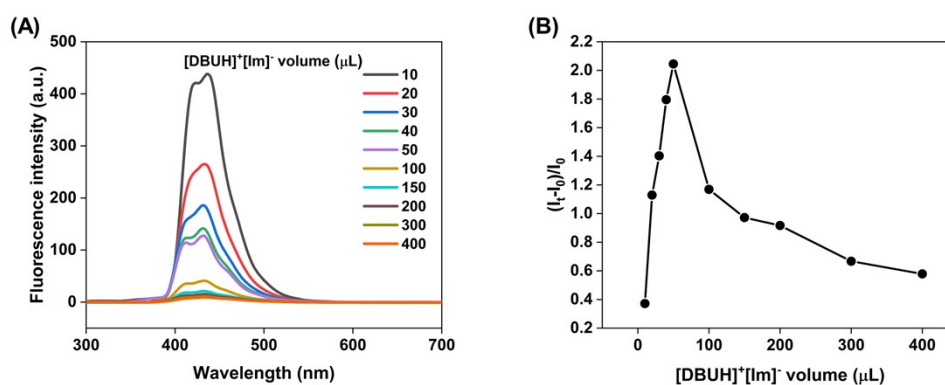

**Figure S11 (A)** Fluorescence spectra of ANT-PPh<sub>3</sub> with the addition of different amounts of [DBUH]<sup>+</sup>[Im]<sup>-</sup>. **(B)** Fluorescence enhancement ratios ((I<sub>t</sub> - I<sub>0</sub>) / I<sub>0</sub>) of ANT-PPh<sub>3</sub> with different amounts of [DBUH]<sup>+</sup>[Im]<sup>-</sup> after injection of 5 mL CO<sub>2</sub>. [ANT-PPh<sub>3</sub>] = 20 μM, in DMSO.

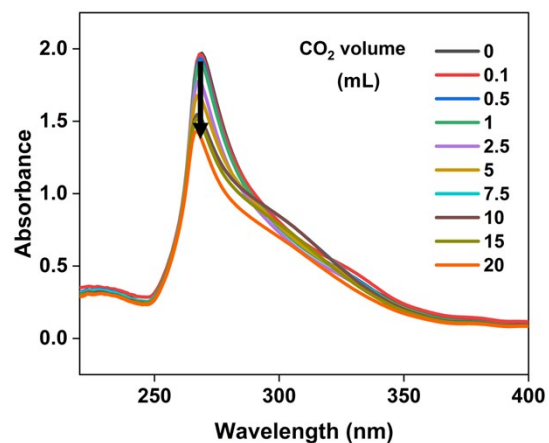

**Figure S12** UV-VIS absorption spectra of ANT-PPh<sub>3</sub> + [DBUH]<sup>+</sup>[Im]<sup>-</sup> in DMSO solution after the injection of different amounts of CO<sub>2</sub>. [ANT-PPh<sub>3</sub>]= 20 μM, V<sub>[DBUH]<sup>+</sup>[Im]<sup>-</sup></sub> = 50 μL.

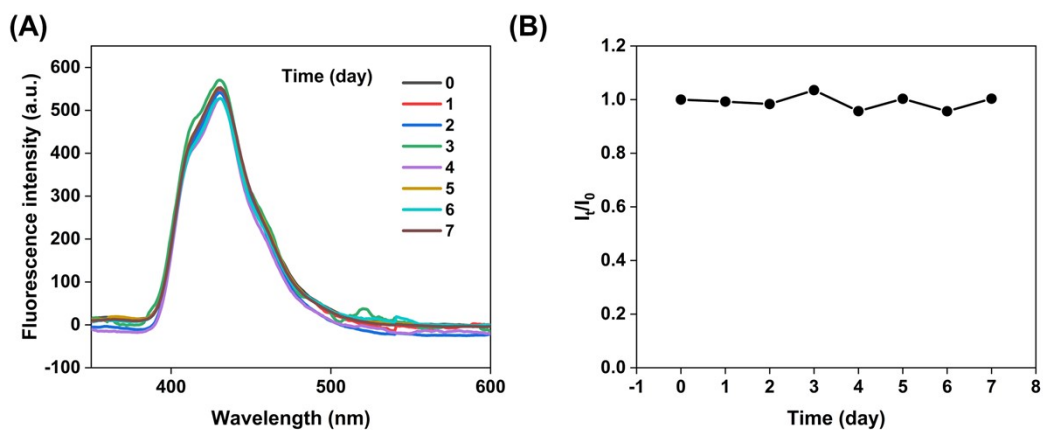

**Figure S13 (A)** Fluorescence spectra of CO<sub>2</sub> paper sensor in a sealed dish under ordinary room light at different times. **(B)** Fluorescence intensities at 430 nm of CO<sub>2</sub> paper sensor in **(A)**.

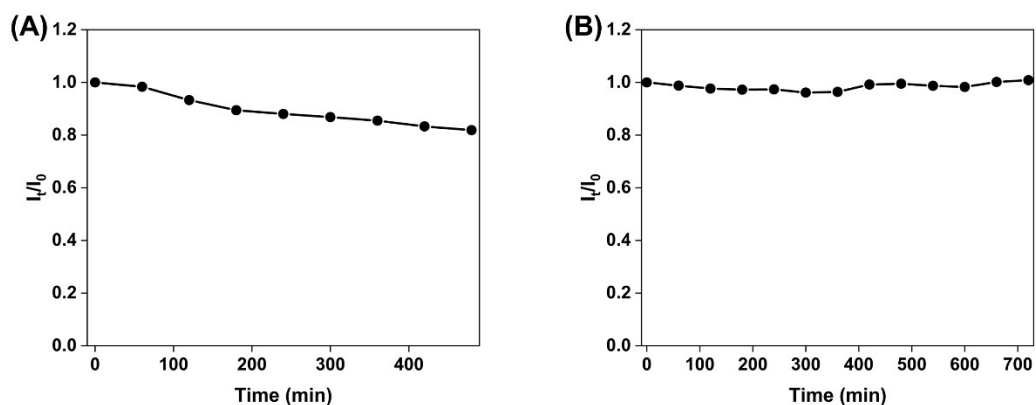

**Figure S14** (A)  $I_t/I_0$  at 430 nm of  $\text{CO}_2$  paper sensor with exposure to 254 nm UV at different times. (B)  $I_t/I_0$  at 430 nm of  $\text{CO}_2$  paper sensor with exposure to white LED at different times.

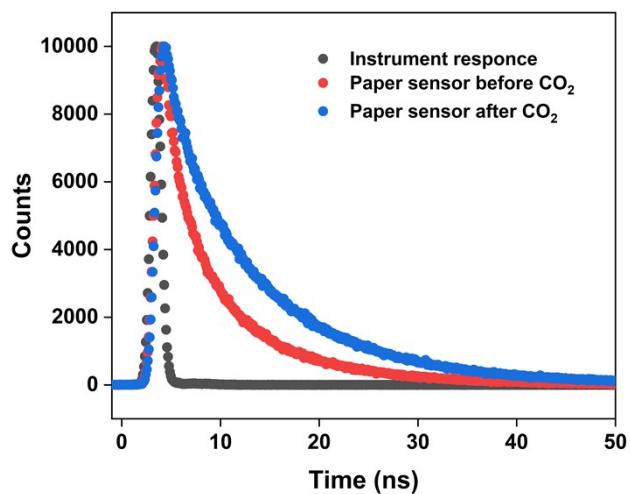

**Figure S15** Fluorescence decay curve of  $\text{CO}_2$  paper sensor before and after exposure to high purity  $\text{CO}_2$  for 1 min.

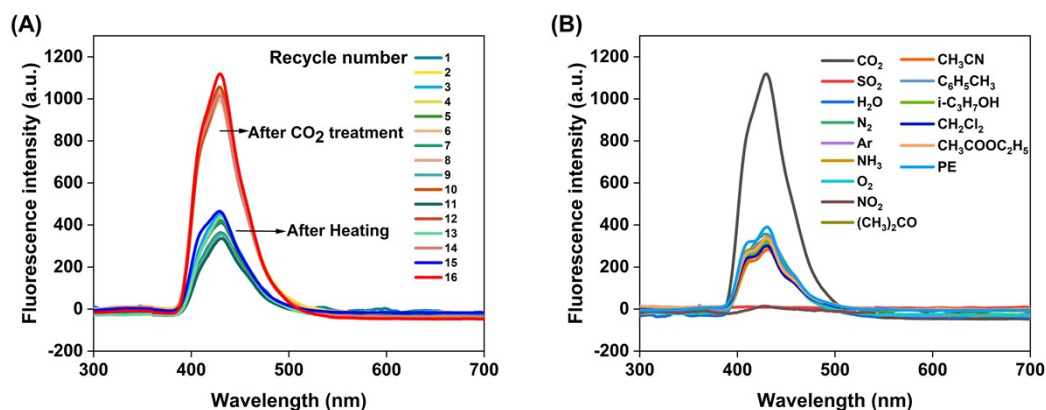

**Figure S16 (A)** Fluorescence spectra of CO<sub>2</sub> paper sensor after CO<sub>2</sub> treatment and 30 min heating alternatively. **(B)** Fluorescence spectra of CO<sub>2</sub> paper sensor after 15 min exposure to different gases (O<sub>2</sub>, N<sub>2</sub>, Ar, CO<sub>2</sub>: >99 vol %, SO<sub>2</sub>, NO<sub>2</sub>: 2 vol %) or saturated vapors. ((CH<sub>3</sub>)<sub>2</sub>CO: acetone; CH<sub>3</sub>COOC<sub>2</sub>H<sub>5</sub>: ethyl acetate; CH<sub>3</sub>CN: acetonitrile; C<sub>6</sub>H<sub>5</sub>CH<sub>3</sub>: toluene; PE: petroleum ether; CH<sub>2</sub>Cl<sub>2</sub>: dichloromethane; i-C<sub>3</sub>H<sub>7</sub>OH: isopropanol)

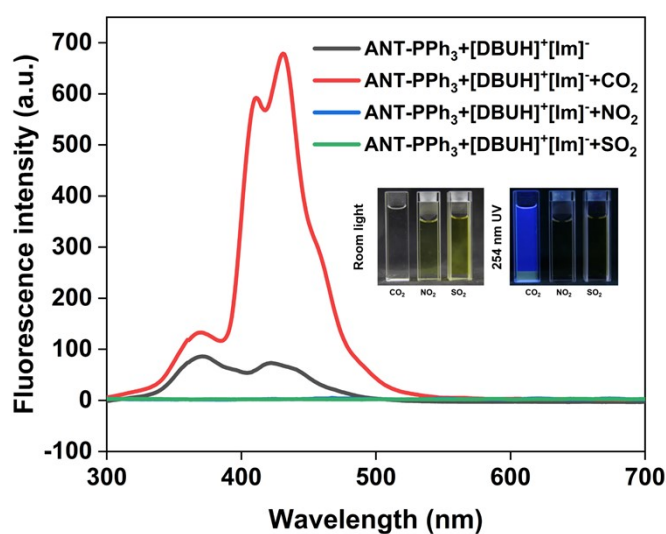

**Figure S17** Fluorescence spectra of ANT-PPh<sub>3</sub> + [DBUH]<sup>+</sup>[Im]<sup>-</sup> after bubbling excessive CO<sub>2</sub>, NO<sub>2</sub>, and SO<sub>2</sub> in DMSO. [ANT-PPh<sub>3</sub>] = 20 μM, V<sub>[DBUH]<sup>+</sup>[Im]<sup>-</sup></sub> = 50 μL. Inset: Photographs of the same set of samples. Fluorescent pictures were taken under 254 nm UV light.

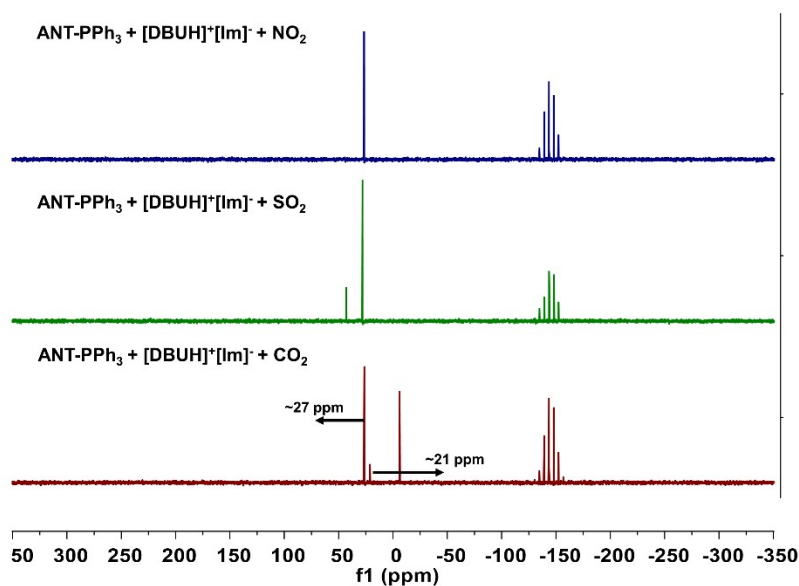

**Figure S18**  $^{31}\text{P}$ -NMR spectra of ANT-PPh<sub>3</sub> + [DBUH]<sup>+</sup>[Im]<sup>-</sup> after bubbling excessive NO<sub>2</sub>, SO<sub>2</sub> and CO<sub>2</sub> in DMSO-*d*<sub>6</sub>.

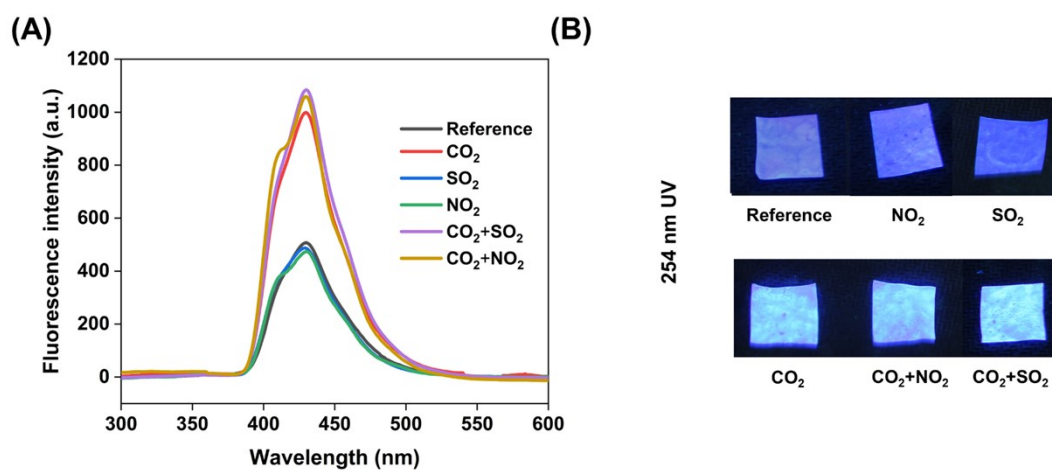

**Figure R19 (A)** Fluorescence spectra of paper sensor after 3 h exposure to different gases of lower concentrations (SO<sub>2</sub>: 200 ppm, NO<sub>2</sub>: 200 ppm, CO<sub>2</sub>: 5500 ppm). **(B)** Fluorescence pictures of CO<sub>2</sub> paper sensors in **(B)**. Pictures were taken under 254 nm UV.

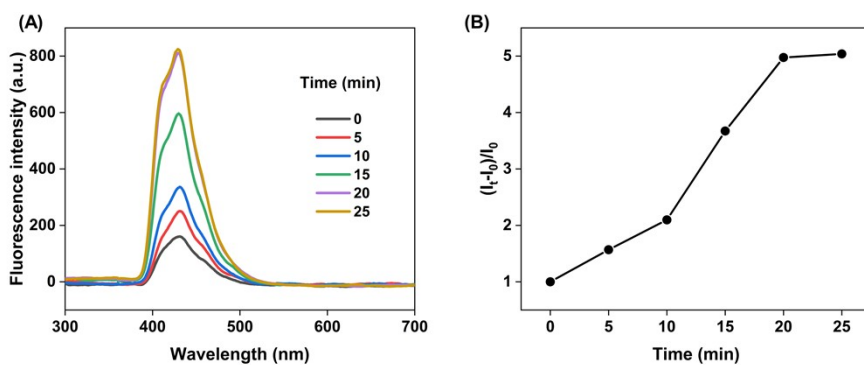

**Figure S20 (A)** Fluorescence spectra of CO<sub>2</sub> paper sensor in a sealed dish after exposure to human breath at different times. **(B)** Fluorescence enhancement ratios  $((I_t - I_0)/I_0)$  at 430 nm of CO<sub>2</sub> paper sensor in **(A)**.

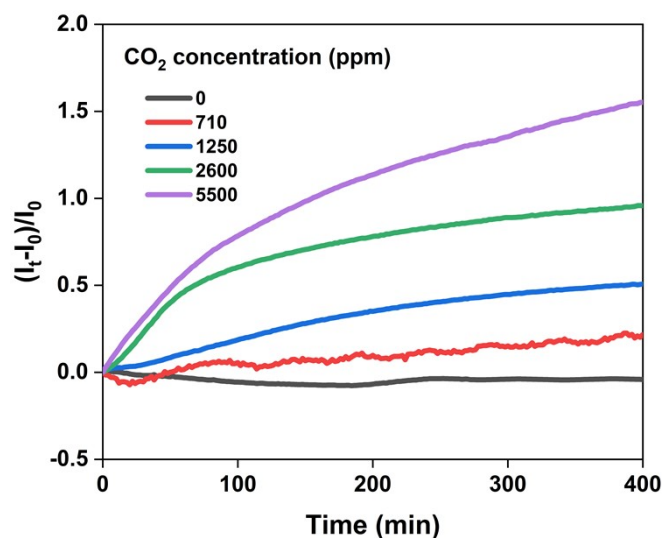

**Figure S21** Fluorescence enhancement ratios of CO<sub>2</sub> paper sensor after exposure to different concentrations of ambient CO<sub>2</sub>. The CO<sub>2</sub> concentrations were determined by a commercial CO<sub>2</sub> detector.

| Sensor type | Selectivity                                   | Sensitivity   | Reversibility                                 | Mechanism                      | Reference |
|-------------|-----------------------------------------------|---------------|-----------------------------------------------|--------------------------------|-----------|
| Paper       | Affected by acidic gases                      | 5.7 ppm       | Reusable after N <sub>2</sub> treatment       | Ratiometric, pH response       | 1         |
| Organogels  | Affected by acidic gases                      | 4.5 ppm       | Non-reusable                                  | Quenching, PET                 | 2         |
| Solution    | Not mentioned                                 | Not mentioned | Reusable after N <sub>2</sub> /heat treatment | Ratiometric, polarity response | 3         |
| Solution    | Affected by acidic vapor                      | Not mentioned | Non-reusable                                  | Enhancement, AIE               | 4         |
| Solution    | Not affected by common gases                  | 0.031 vol %   | Reusable after NaOH treatment                 | Quenching, AIE                 | 5         |
| Solution    | Not mentioned                                 | Not mentioned | Non-reusable                                  | Enhancement, AIE               | 6         |
| Solution    | Not mentioned                                 | Not mentioned | Non-reusable                                  | Quenching, ICT                 | 7         |
| Paper       | Not affected by common gases and acidic gases | 0.183 vol %   | Reusable after heat treatment                 | Enhancement, PET               | This work |

**Table S1** Comparison of fluorescence-based optical sensors for gaseous CO<sub>2</sub>.

| Category                                                                                   | $\tau$ (ns) |
|--------------------------------------------------------------------------------------------|-------------|
| ANT-PPh <sub>3</sub> <sup>a</sup>                                                          | 7.8         |
| ANT-PPh <sub>3</sub> + [DBUH] <sup>+</sup> [Im] <sup>-</sup> <sup>b</sup>                  | 4.0         |
| ANT-PPh <sub>3</sub> + [DBUH] <sup>+</sup> [Im] <sup>-</sup> +CO <sub>2</sub> <sup>c</sup> | 8.5         |
| Paper sensor without CO <sub>2</sub>                                                       | 6.9         |
| Paper sensor with CO <sub>2</sub>                                                          | 10.0        |

a: [ANT-PPh<sub>3</sub>] = 20  $\mu$ M, in DMSO.

b: [ANT-PPh<sub>3</sub>] = 20  $\mu$ M, V<sub>[DBUH]<sup>+</sup>[Im]<sup>-</sup></sub> = 50  $\mu$ L, in DMSO.

c: [ANT-PPh<sub>3</sub>] = 20  $\mu$ M, V<sub>[DBUH]<sup>+</sup>[Im]<sup>-</sup></sub> = 50  $\mu$ L, CO<sub>2</sub> bubbling for 1 min, in DMSO.

**Table S2** Fluorescence lifetimes of ANT-PPh<sub>3</sub> in different chemical environments.

## References

1. H. Wang, S. I. Vagin, B. Rieger and A. Meldrum, *ACS Applied Materials & Interfaces*, 2020, **12**, 20507-20513.
2. Y. Ma, M. Cametti, Z. Džolić and S. Jiang, *Journal of Materials Chemistry C*, 2018, **6**, 9232-9237.
3. Y.-J. Jin, B.-C. Moon and G. Kwak, *Dyes and Pigments*, 2016, **132**, 270-273.
4. H. Yuan, Y. Fan, C. Xing, R. Niu, R. Chai, Y. Zhan, J. Qi, H. An and J. Xu, *Analytical Chemistry*, 2016, **88**, 6593-6597.
5. H. Wang, D. Chen, Y. Zhang, P. Liu, J. Shi, X. Feng, B. Tong and Y. Dong, *Journal of Materials Chemistry C*, 2015, **3**, 7621-7626.
6. Y. Liu, Y. Tang, N. N. Barashkov, I. S. Irgibaeva, J. W. Y. Lam, R. Hu, D. Birimzhanova, Y. Yu and B. Z. Tang, *Journal of the American Chemical Society*, 2010, **132**, 13951-13953.
7. R. Ali, S. S. Razi, M. Shahid, P. Srivastava and A. Misra, *Spectrochimica Acta Part A: Molecular and Biomolecular Spectroscopy*, 2016, **168**, 21-28.
